# Supplementary material
Source: Research Square preprint supplement (doi:10.21203/rs.3.rs-9879471/v1)
Supplement: Supplementary file 1 [file 27fb9cf308d75cbc28ff0021.docx]

# **SUPPLEMENTARY APPENDIX F: SUMMARY OF EVIDENCE TABLE**

| Domain | Studies (n) | Participants (n) | Main Finding | Effect Size | 95% CI | I² | GRADE Certainty |
| --- | --- | --- | --- | --- | --- | --- | --- |
| Defect prevalence (any) | 42 | 6,847 | 29.4% prevalence | 29.4% | 24.7-34.1% | 86% | ⨁⨁⨁◯ Moderate |
| Defect prevalence - Class III | 14 | ~2,000 | 42.3% prevalence | 42.3% | 35.1-49.5% | — | ⨁⨁⨁◯ Moderate |
| Defect prevalence - Hyperdivergent | 8 | ~1,200 | 45.2% prevalence | 45.2% | 37.0-53.4% | — | ⨁⨁⨁◯ Moderate |
| OTM rate - Healthy bone | 1 primary | 120 teeth | 1.17 mm/month | — | — | — | ⨁⨁⨁◯ Moderate |
| OTM rate - Fenestration | 1 primary | 120 teeth | 26% slower | 0.87 mm/month | — | — | ⨁⨁⨁◯ Moderate |
| OTM rate - Quasidefect | 1 primary | 120 teeth | 47% slower | 0.62 mm/month | — | — | ⨁⨁⨁◯ Moderate |
| OTM rate - Adolescents | 7 | 354 | 1.22 mm/month | 1.22 | 1.10-1.34 | 67% | ⨁⨁⨁◯ Moderate |
| OTM rate - Adults | 7 | 320 | 0.88 mm/month | 0.88 | 0.79-0.97 | 67% | ⨁⨁⨁◯ Moderate |
| Rate ratio (Adult/Adolescent) | 7 | 674 | 28% slower in adults | 0.72 | 0.65-0.79 | 67% | ⨁⨁⨁◯ Moderate |
| Alveolar bone loss - Adults vs. Adolescents | 5 | ~600 | 2-3× greater risk | Narrative | — | — | ⨁⨁◯◯ Low |
| PAOO - OTM acceleration | 6 RCTs | 324 | 49% faster | +49% | 39-61% | 68% | ⨁⨁⨁◯ Moderate |
| PAOO - Bone thickness gain | 4 RCTs | 208 | +0.85 mm | +0.85 | 0.6-1.1 | 52% | ⨁⨁⨁◯ Moderate |
| PAOO - Dehiscence prevention (RR) | 3 RCTs | 156 | 78% reduction | 0.22 | 0.12-0.41 | 41% | ⨁⨁⨁◯ Moderate |
| PAOO - Treatment duration | 10 studies | ~400 | 30-50% reduction | — | — | — | ⨁⨁⨁◯ Moderate |
| Corticotomy - Treatment time | 12 studies | ~300 | 8.85 vs. 16.4 months | — | — | — | ⨁⨁◯◯ Low |
| MOPs - 1 month acceleration | 6 studies | ~200 | +0.42-0.65 mm | — | — | — | ⨁⨁◯◯ Low |
| MOPs - Beyond 1 month | 4 studies | ~150 | No significant effect | — | — | — | ⨁⨁◯◯ Low |
| Piezocision - Treatment time | 5 studies | ~150 | 43% reduction | -43% | — | — | ⨁⨁◯◯ Low |
| Vibration (human) | 3 RCTs | 188 | No significant effect | — | — | — | ⨁◯◯◯ Very Low |
| LLLT (human) | 8 studies | ~300 | Inconsistent | — | — | — | ⨁◯◯◯ Low |
| Defects - EARR risk | 4 studies | 587 | 2.8× increased risk | OR 2.84 | 1.73-4.66 | — | ⨁⨁⨁◯ Moderate |
| Asymmetric movement | 1 study | 26 patients | 85% with unilateral defects | — | — | — | ⨁⨁⨁◯ Moderate |
| Cortical plates as boundaries | 15 studies | >1,000 | Consistent finding | — | — | — | ⨁⨁⨁◯ Moderate |
| Inclination extremes | 1 study | 360 teeth | Proclination OR 3.8 | OR 3.8 | 2.1-6.9 | — | ⨁⨁⨁◯ High |
| Bone thickness <1 mm = high risk | 2 studies | ~100 | Consistent | — | — | — | ⨁⨁⨁◯ Moderate |
