# Supplementary material
Source: Research Square preprint supplement (doi:10.21203/rs.3.rs-9879471/v1)
Supplement: Supplementary file 2 [file 5eeb138f9a2a8b079c24b743.docx]

# **SUPPLEMENTARY APPENDIX C: FULL GRADE EVIDENCE PROFILES FOR MAJOR OUTCOMES**

## **GRADE Evidence Profile Format**

For each outcome, the following domains are assessed:

| Domain | Assessment Options |
| --- | --- |
| Risk of bias | Not serious / Serious / Very serious |
| Inconsistency | Not serious / Serious / Very serious |
| Indirectness | Not serious / Serious / Very serious |
| Imprecision | Not serious / Serious / Very serious |
| Publication bias | Not detected / Suspected / Strongly suspected |
| Upgrading factors | Large effect / Dose-response / Confounding would reduce effect |

**Starting certainty:**

- RCTs: High
- Observational studies: Low

## **Table C1: Pre-Existing Alveolar Bone Defects (Prevalence)**

| Domain | Assessment | Justification |
| --- | --- | --- |
| **Outcome** | Prevalence of fenestration/dehiscence |  |
| **Population** | Adult orthodontic patients |  |
| **Studies (n)** | 42 cross-sectional CBCT studies |  |
| **Patients (n)** | 6,847 |  |
| **Pooled prevalence** | 29.4% (95% CI 24.7-34.1%) |  |
| **Heterogeneity** | I² = 86% (95% CI 82-90%) |  |

| Domain | Rating | Justification |
| --- | --- | --- |
| Risk of bias | Not serious | Most studies low/moderate RoB |
| Inconsistency | Serious (-1) | I² = 86%, substantial heterogeneity |
| Indirectness | Not serious | Direct assessment of defect prevalence |
| Imprecision | Not serious | Large sample size, narrow CI |
| Publication bias | Not detected | Funnel plot symmetrical (Egger's p=0.12) |
| **Starting certainty** | **Low** (observational) |  |
| Upgrading factors | None | Heterogeneity precludes upgrading |
| **Final certainty** | **MODERATE** | ⨁⨁⨁◯ |

**Explanation:** High heterogeneity (I²=86%) downgrades certainty despite large sample size and consistent direction of effect.

## **Table C2: Impact of Defects on OTM Rate**

| Domain | Assessment | Justification |
| --- | --- | --- |
| **Outcome** | OTM rate (mm/month) |  |
| **Population** | Adult orthodontic patients with canine retraction |  |
| **Studies (n)** | 3 (1 primary, 2 supporting) |  |
| **Teeth (n)** | 312 |  |

| Bone Status | OTM Rate (mm/month) | Effect Estimate |
| --- | --- | --- |
| Healthy | 1.17 | Reference |
| Fenestration | 0.87 | 26% slower |
| Quasidefect | 0.62 | 47% slower |

| Domain | Rating | Justification |
| --- | --- | --- |
| Risk of bias | Not serious | Ritwiroon et al. low RoB |
| Inconsistency | Not serious | Supporting studies consistent |
| Indirectness | Not serious | Direct measurement of OTM rate |
| Imprecision | Moderate (-1) | Single primary study |
| Publication bias | Not detected | Insufficient studies for assessment |
| **Starting certainty** | **Low** (observational) |  |
| Upgrading factors | Large effect (+1) | 26-47% reduction is clinically significant |
| **Final certainty** | **MODERATE** | ⨁⨁⨁◯ |

**Explanation:** Upgraded for large effect size; downgraded for single primary study.

## **Table C3: Age-Related Differences in OTM Rate (Adults vs. Adolescents)**

| Domain | Assessment | Justification |
| --- | --- | --- |
| **Outcome** | OTM rate (mm/month) |  |
| **Population** | Orthodontic patients |  |
| **Studies (n)** | 7 clinical studies |  |
| **Patients (n)** | 674 |  |

| Age Group | Pooled OTM Rate (mm/month) | Rate Ratio |
| --- | --- | --- |
| Adolescents | 1.22 (95% CI 1.10-1.34) | Reference |
| Adults | 0.88 (95% CI 0.79-0.97) | 0.72 (95% CI 0.65-0.79) |

| Domain | Rating | Justification |
| --- | --- | --- |
| Risk of bias | Moderate (-1) | Mainly retrospective studies |
| Inconsistency | Moderate (-1) | I² = 67% |
| Indirectness | Not serious | Direct comparison of age groups |
| Imprecision | Not serious | Narrow CI, adequate sample size |
| Publication bias | Not detected | Funnel plot mild asymmetry (Egger's p=0.18) |
| **Starting certainty** | **Low** (observational) |  |
| Upgrading factors | Large effect (+1) | 28% reduction is clinically significant |
| **Final certainty** | **MODERATE** | ⨁⨁⨁◯ |

**Explanation:** Downgraded for risk of bias and inconsistency; upgraded for large effect.

## **Table C4: Alveolar Bone Loss (Adults vs. Adolescents)**

| Domain | Assessment | Justification |
| --- | --- | --- |
| **Outcome** | Alveolar bone loss (CEJ-crest distance increase) |  |
| **Population** | Orthodontic patients post-treatment |  |
| **Studies (n)** | 5 (narrative synthesis) |  |
| **Effect** | Adults have 2-3× greater risk of bone loss >2 mm |  |

| Domain | Rating | Justification |
| --- | --- | --- |
| Risk of bias | Moderate (-1) | Retrospective studies |
| Inconsistency | Not serious | Consistent direction |
| Indirectness | Not serious | Direct bone measurement |
| Imprecision | Serious (-1) | No pooled estimate; narrative only |
| Publication bias | Not detected | Insufficient studies |
| **Starting certainty** | **Low** (observational) |  |
| Upgrading factors | None | Narrative synthesis only |
| **Final certainty** | **LOW** | ⨁⨁◯◯ |

**Explanation:** Narrative synthesis without pooled estimate; retrospective design. Cannot be upgraded.

## **Table C5: PAOO Effectiveness**

| Domain | Assessment | Justification |
| --- | --- | --- |
| **Outcome** | OTM acceleration and bone augmentation |  |
| **Population** | Adult orthodontic patients |  |
| **Studies (n)** | 8 RCTs; 6 for meta-analysis |  |

| Outcome | Effect | 95% CI | I² |
| --- | --- | --- | --- |
| OTM acceleration | +49% | 39-61% | 68% |
| Bone thickness gain | +0.85 mm | 0.6-1.1 | 52% |
| Dehiscence prevention (RR) | 0.22 | 0.12-0.41 | 41% |

| Domain | Rating | Justification |
| --- | --- | --- |
| Risk of bias | Not serious | RCTs, most low RoB |
| Inconsistency | Moderate (-1) | I² = 68%, varied protocols |
| Indirectness | Not serious | Direct intervention comparison |
| Imprecision | Not serious | Adequate sample size |
| Publication bias | Not detected | Funnel plot not feasible (n<10) |
| **Starting certainty** | **High** (RCTs) |  |
| Downgrading factors | Inconsistency (-1) | Heterogeneous protocols |
| **Final certainty** | **MODERATE** | ⨁⨁⨁◯ |

**Explanation:** RCTs start at high certainty; downgraded for inconsistency (varied protocols).

## **Table C6: Cortical Plates as Biological Boundaries**

| Domain | Assessment | Justification |
| --- | --- | --- |
| **Outcome** | Fenestration/dehiscence formation |  |
| **Population** | Adult orthodontic patients |  |
| **Studies (n)** | 15 (CBCT/CT, observational) |  |

| Domain | Rating | Justification |
| --- | --- | --- |
| Risk of bias | Not serious | Consistent methodology |
| Inconsistency | Not serious | Consistent findings |
| Indirectness | Not serious | Direct assessment |
| Imprecision | Not serious | Large sample across studies |
| Publication bias | Not detected | Funnel plot not feasible |
| **Starting certainty** | **Low** (observational) |  |
| Upgrading factors | Large effect (+1), dose-response (+1), consistency (+1) | Thinner bone → higher risk; consistent across 15 studies |
| **Final certainty** | **MODERATE** | ⨁⨁⨁◯ |

**Explanation:** Observational evidence upgraded to moderate due to large effect, dose-response, and consistency. "High" would require RCT evidence.

## **Table C7: Physical Stimulation (Human Evidence)**

| Domain | Assessment | Justification |
| --- | --- | --- |
| **Outcome** | OTM acceleration |  |
| **Population** | Adult orthodontic patients |  |
| **Intervention** | High-frequency vibration |  |
| **Studies (n)** | 3 human RCTs |  |

| Domain | Rating | Justification |
| --- | --- | --- |
| Risk of bias | Not serious | RCTs, low RoB |
| Inconsistency | Not serious | Consistent null findings |
| Indirectness | Not serious | Direct intervention |
| Imprecision | Serious (-1) | Few studies, small samples |
| Publication bias | Not detected | Insufficient studies |
| **Starting certainty** | **High** (RCTs) |  |
| Downgrading factors | Imprecision (-1), very small effect size (-1) | No significant acceleration; studies underpowered |
| **Final certainty** | **VERY LOW** | ⨁◯◯◯ |

**Explanation:** Despite RCT design, very small effect size and imprecision result in very low certainty.
