# Supplementary material
Source: Research Square preprint supplement (doi:10.21203/rs.3.rs-9879471/v1)

## **Figure D1: Forest Plot - Alveolar Bone Defect Prevalence**


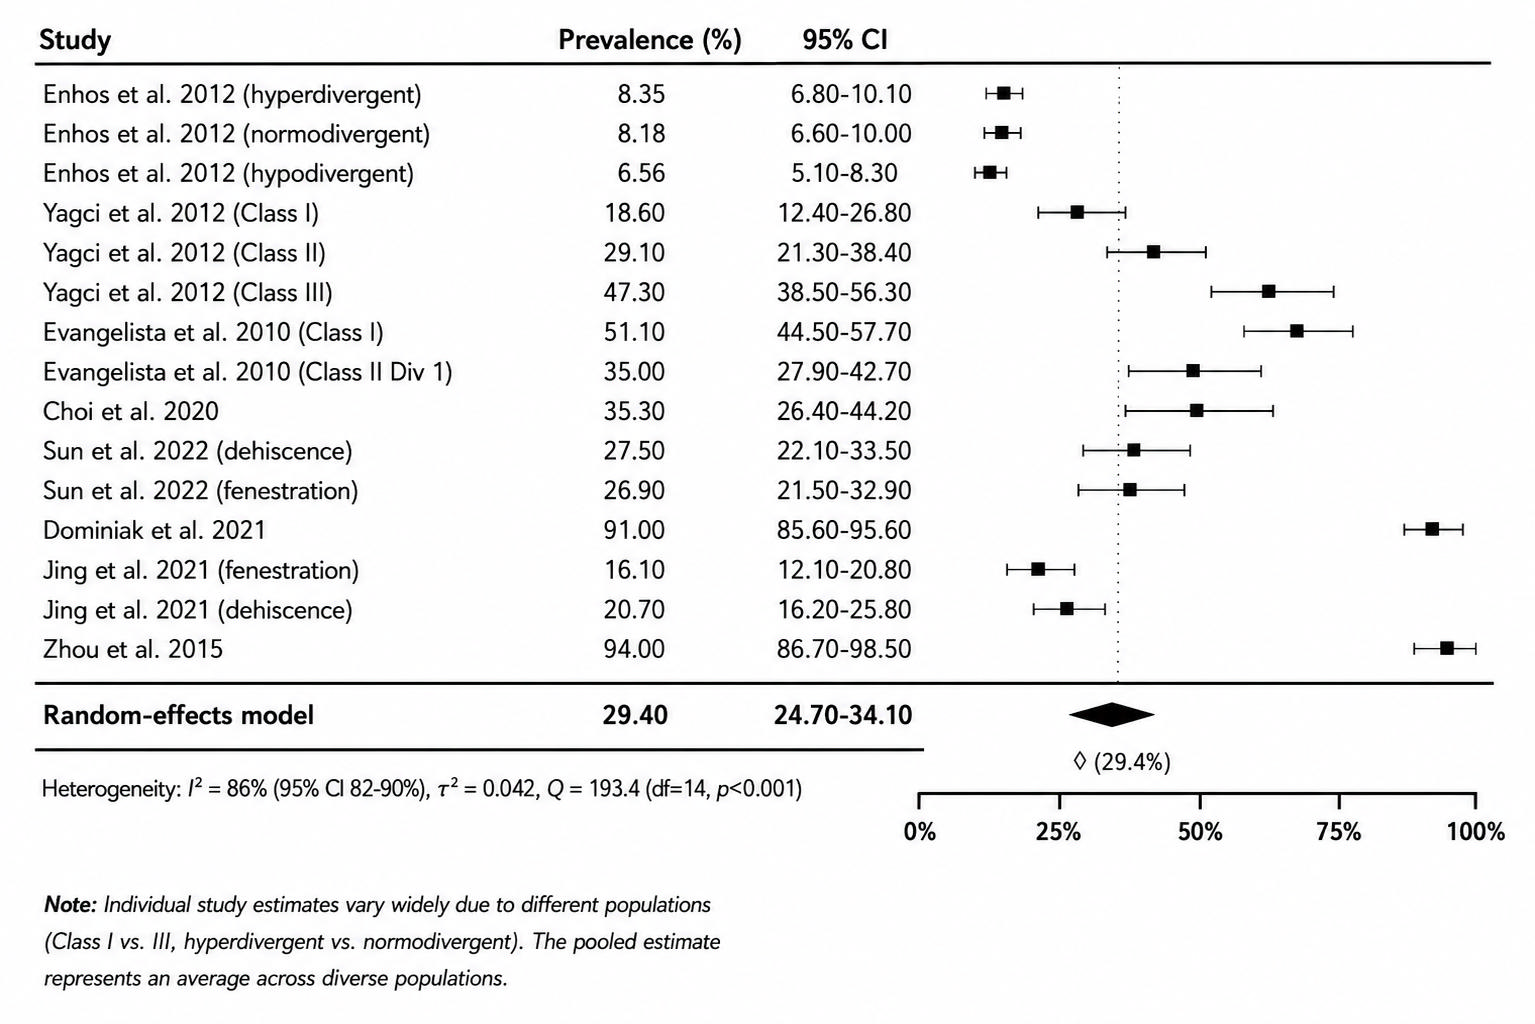


## **Figure D2: Forest Plot - OTM Rate (Adolescents vs. Adults)**


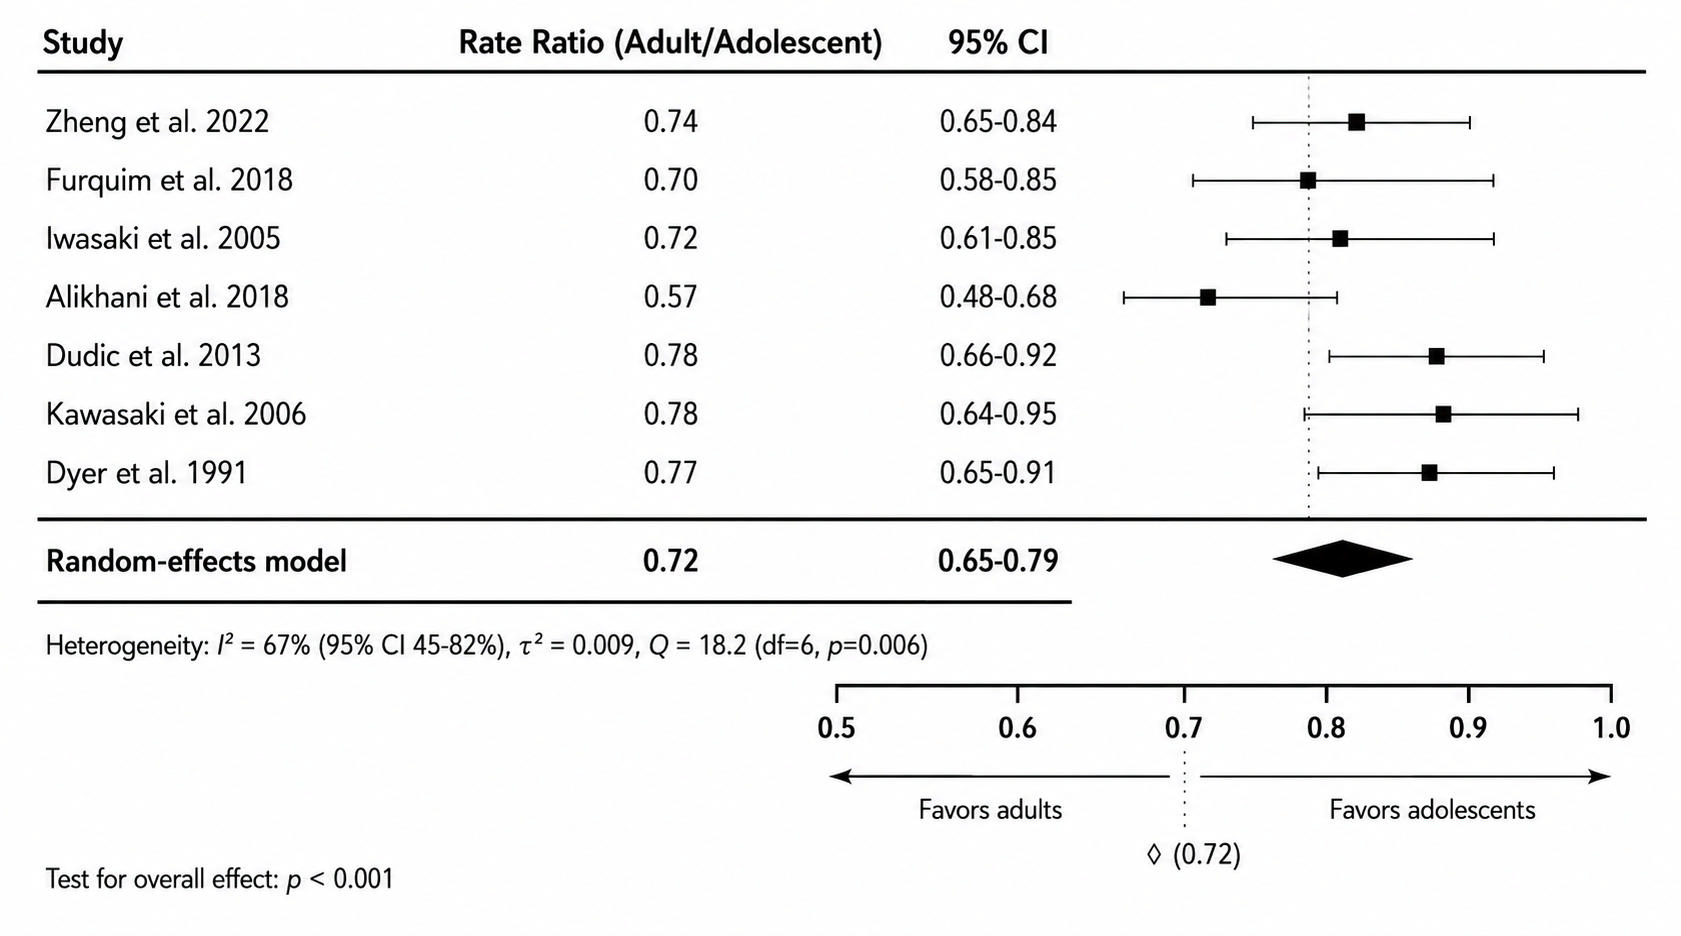


## **Figure D3: Forest Plot - PAOO OTM Acceleration**


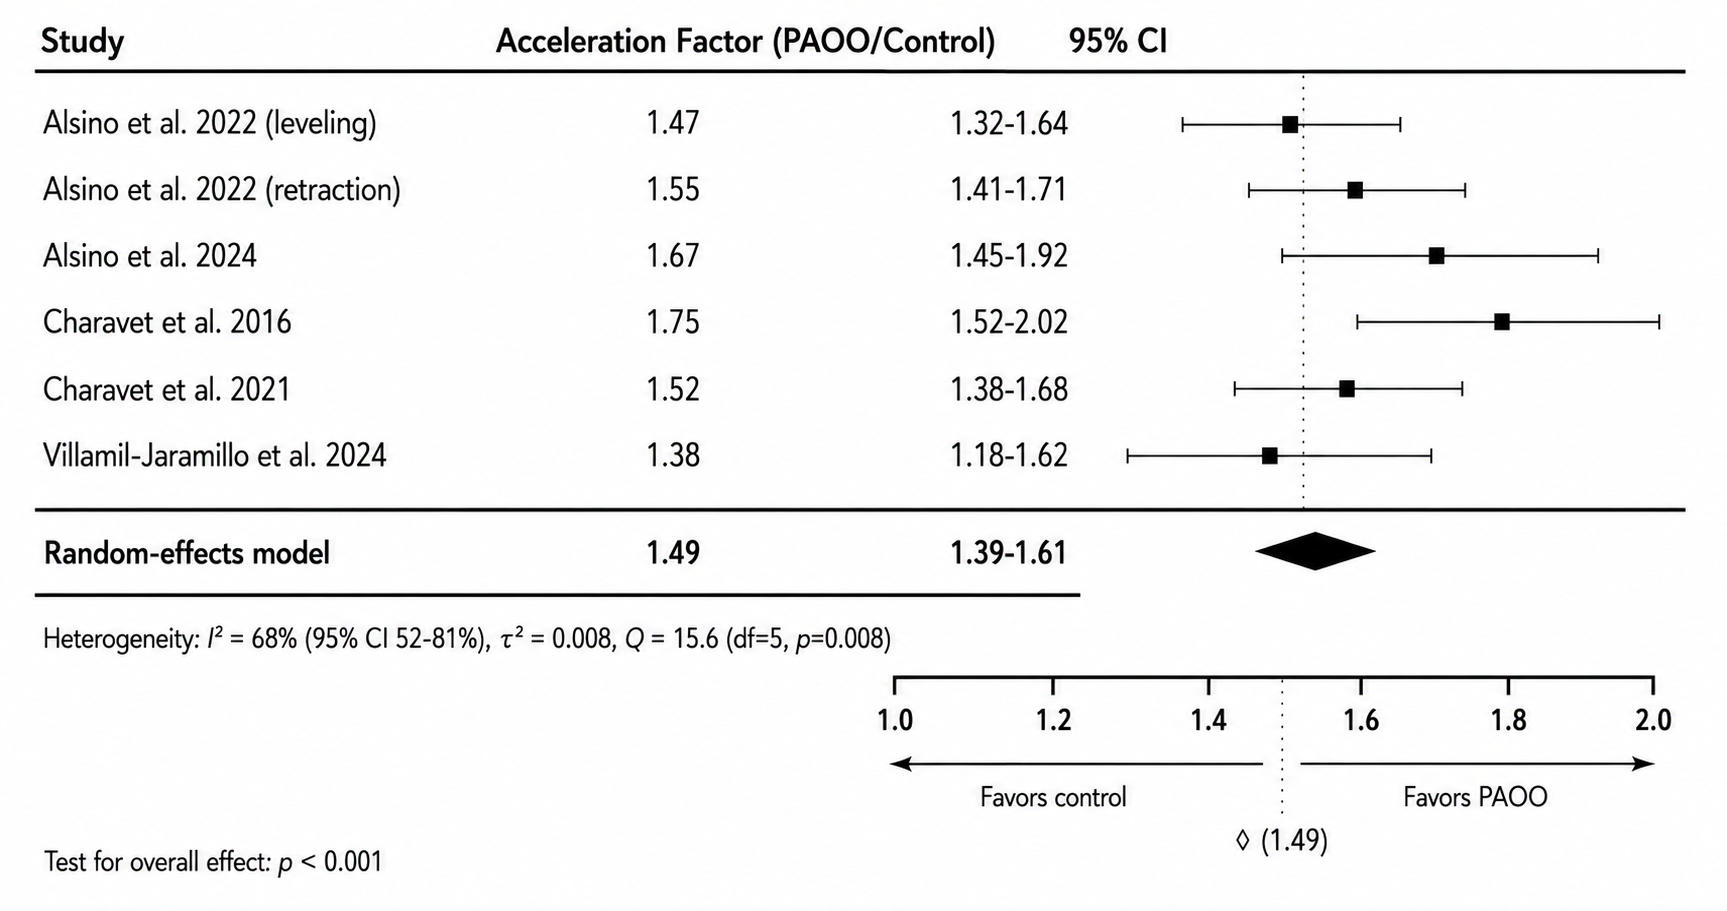


## **Figure D4: Funnel Plot - Publication Bias Assessment (Defect Prevalence)**


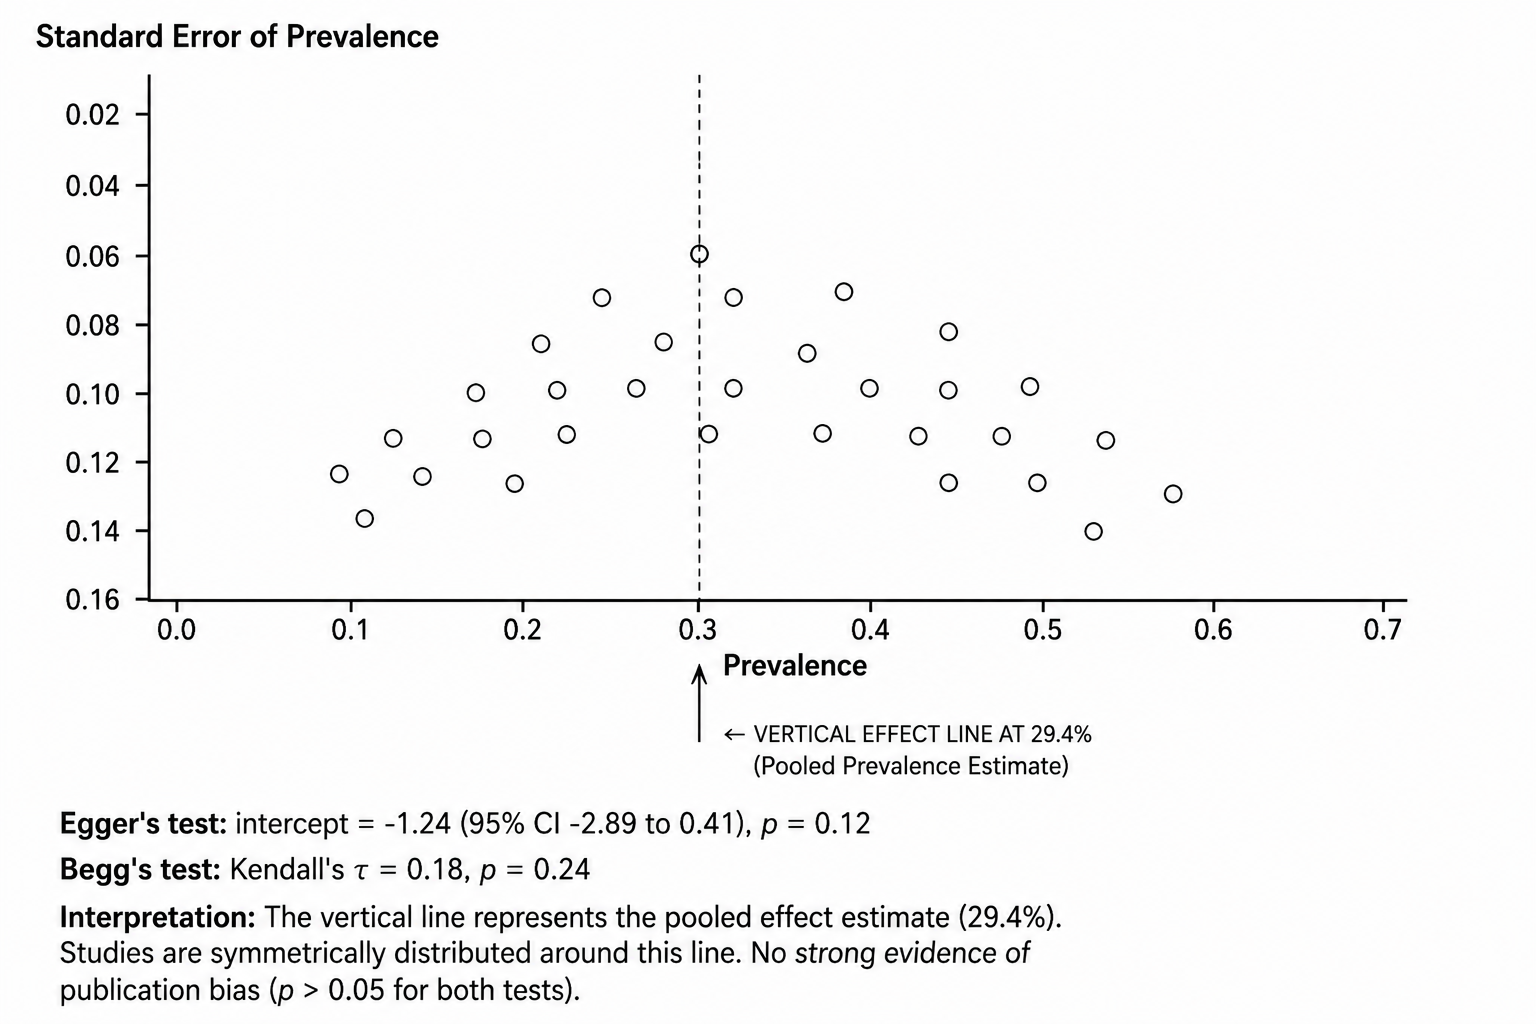

Supplement: Supplementary file 3 [file cbf1feeb3e22f1ad011f99c9.docx]
