# Supplementary material
Source: Research Square preprint supplement (doi:10.21203/rs.3.rs-9879471/v1)
Supplement: Supplementary file 5 [file d995764d593e82a4489af0ee.docx]

# **SUPPLEMENTARY APPENDIX G: LIMITATIONS ACKNOWLEDGMENT STATEMENT**

**To be included in the manuscript (Section 15.3):**

The following limitations of this review are acknowledged:

1. **Restricted database search (PubMed and Cochrane only).** Embase, Scopus, and Web of Science were not searched. This may have resulted in the omission of relevant studies and may have influenced prevalence estimates and intervention effect sizes.
2. **Protocol not registered with PROSPERO.** This may introduce risk of reporting bias, although reporting followed PRISMA guidelines.
3. **High heterogeneity (I² 67-86%)** for prevalence and OTM rate meta-analyses reflects differences in populations and methods.
4. **The majority of included studies were observational in design,** limiting causal inference for several outcomes.
5. **Publication bias could not be formally assessed** for all outcomes due to insufficient numbers of studies (<10).
6. **Animal data dominate mechanistic understanding;** translation to humans is uncertain.
7. **Confounding (smoking, oral hygiene, systemic disease)** was incompletely addressed in many studies.
8. **The 2024-2026 references (Ritwiroon et al. 2025, Hobani et al. 2025, Yin et al. 2025, Zhou et al. 2025, Yadav et al. 2025)** have been verified against original sources, but readers should be aware that very recent publications may not have been fully indexed at the time of review.
9. **Expert consensus recommendations (force reduction percentages, activation intervals)** are not directly supported by included studies and should be interpreted cautiously.
10. **The absence of a protocol registered with PROSPERO** means that selective reporting bias cannot be entirely excluded, although we have attempted to mitigate this by adhering strictly to PRISMA guidelines and transparently reporting all outcomes.
