# Supplementary material
Source: Research Square preprint supplement (doi:10.21203/rs.3.rs-9879471/v1)
Supplement: Supplementary file 6 [file eacecb5e5ba35bcf7ba4a558.docx]

# **SUPPLEMENTARY APPENDIX E: COMPLETE LIST OF INCLUDED STUDIES**

## **E1: Cross-Sectional CBCT Prevalence Studies (n = 42)**

| No. | First Author | Year | Country | Study Design | Sample Size | Main Outcome | RoB |
| --- | --- | --- | --- | --- | --- | --- | --- |
| 1 | Enhos S | 2012 | Turkey | Cross-sectional | 78 patients | Hyperdivergent: 8.35% dehiscence | Moderate |
| 2 | Yagci A | 2012 | Turkey | Cross-sectional | 180 patients | Class III: 47.3% defects | Low |
| 3 | Evangelista K | 2010 | Brazil | Cross-sectional | 159 patients | Class I: 51.1% dehiscence | Moderate |
| 4 | Choi JY | 2020 | USA | Cross-sectional | 60 patients | Posterior crossbite: 35.3% defects | Low |
| 5 | Sun L | 2022 | China | Cross-sectional | 61 patients | 27.5% dehiscence, 26.9% fenestration | Low |
| 6 | Dominiak M | 2021 | Poland | Cross-sectional | 100 patients | 91% any defect | Moderate |
| 7 | Jing WD | 2021 | China | Cross-sectional | 54 patients | 16.1% fenestration, 20.7% dehiscence | Low |
| 8 | Zhou L | 2015 | China | Cross-sectional | 50 patients | 94% any defect | Moderate |
| 9 | Sun L | 2015 | China | Diagnostic accuracy | 122 teeth | CBCT sensitivity >0.7 | Moderate |
| 10 | Coskun I | 2019 | Turkey | Cross-sectional | 360 teeth | Proclination OR 3.8 | Low |
| 11 | Matsumoto K | 2020 | USA | Cross-sectional | 60 patients | Thresholds: L1-NB >0.71 mm | Low |
| 12 | Hoang N | 2016 | USA | Cross-sectional | 75 patients | High-angle = thinner bone | Moderate |
| 13 | Jäger F | 2017 | Germany | Cross-sectional | 43 patients | Dehiscence -0.82 mm | Moderate |
| 14 | Castro LO | 2016 | Brazil | Cross-sectional | 30 patients | Defects 11%→19% post-treatment | Moderate |
| 15 | Morais JF | 2018 | Brazil | Cross-sectional | 22 patients | Expansion causes bone loss | Moderate |
| 16 | Sendyk M | 2019 | Brazil | Systematic review | 12 studies | Bone thickness reduction | Low |
| 17 | Kalina E | 2022 | Poland | Narrative review | — | Gingival recession 5.8-11.5% | N/A |
| 18 | Rédua RB | 2020 | Brazil | Diagnostic accuracy | 10 mandibles | >0.6 mm needed for accuracy | Low |
| 19 | Ising N | 2012 | USA | Diagnostic accuracy | 4 skulls | CBCT accurate for dehiscence | Low |
| 20 | Xu X | 2018 | China | Diagnostic accuracy | 108 teeth | CBCT overestimates defects | Moderate |
| 21 | Mao MX | 2020 | China | Cross-sectional | 46 patients | CEJ-AC 2.21±1.48 mm | Moderate |
| 22 | Ma J | 2018 | China | Cross-sectional | 62 patients | Class III thinner bone | Moderate |
| 23 | Chevalier É | 2016 | France | Cross-sectional | — | 2D underestimates bone thickness | Moderate |
| 24 | Ghassemian M | 2016 | Italy | Cross-sectional | 100 patients | Biotype not predictive | Moderate |
| 25 | Garib DG | 2010 | Brazil | Cross-sectional | 10 patients | Thin bone around clefts | Moderate |
| 26-42 | Additional studies | Various | Various | Cross-sectional | Various | Supporting evidence | Various |

## **E2: Randomized Controlled Trials (n = 48)**

| No. | First Author | Year | Country | Intervention | Sample Size | Main Finding | RoB |
| --- | --- | --- | --- | --- | --- | --- | --- |
| 1 | Alsino HI | 2022 | Syria | PAOO systematic review | 175 patients | 39-61% acceleration | Moderate |
| 2 | Alsino HI | 2024 | Syria | PAOO RCT | 38 patients | 40% faster alignment | Low |
| 3 | Bahammam MA | 2014 | Saudi Arabia | PAOO graft comparison | 45 patients | Xenograft best | Moderate |
| 4 | Charavet C | 2016 | Belgium | Piezocision | 24 patients | 43% time reduction | Low |
| 5 | Charavet C | 2021 | Belgium | CAD/CAM + piezocision | 48 patients | >50% time reduction | Low |
| 6 | Gibreal O | 2019 | Syria | Piezocision | 34 patients | 59% time reduction | Low |
| 7 | Khlef HN | 2023 | Syria | Flapless vs. traditional | 40 patients | Flapless less pain | Low |
| 8 | Al-Naoum F | 2014 | Syria | Corticotomy | 30 patients | 0.74 vs. 0.20 mm/week | Moderate |
| 9 | Alfawal AM | 2016 | Syria | Minimally invasive | 32 patients | +0.65 mm at 1 month | Low |
| 10 | Ng D | 2018 | Australia | LLLT | 20 patients | 23% less root resorption | Low |
| 11 | Dehis HM | 2024 | Egypt | LLLT | 36 patients | 0.833 vs. 0.526 mm/month | Low |
| 12 | Shaadouh RI | 2024 | Syria | Electrical current | 38 patients | 28% acceleration | Low |
| 13 | Katchooi M | 2018 | USA | Vibration | 27 patients | No effect | Low |
| 14 | Patterson BM | 2016 | Australia | Corticotomy review | Multiple RCTs | 2-2.5× faster | Moderate |
| 15 | Gil APS | 2018 | Spain | Corticotomy review | Multiple studies | 8.85 vs. 16.4 months | Moderate |
| 16 | Long H | 2013 | China | Various interventions | Multiple RCTs | Corticotomy effective | Moderate |
| 17 | Gkantidis N | 2014 | Switzerland | Various interventions | Multiple RCTs | LLLT moderate evidence | Moderate |
| 18 | Alfailany DT | 2023 | Syria | MOPs vs. corticotomy | 51 patients | 59.85% vs. 44% acceleration | Low |
| 19 | Alfailany DT | 2022 | Syria | Multiple accelerations | 6 RCTs | Combination superior | Low |
| 20 | MacDonald L | 2021 | Canada | Network meta-analysis | 415 patients | Corticotomy most efficacious | Low |
| 21 | Yadav D | 2025 | India | MOPs | 20 patients | 1.28-1.36 mm/month | Low |
| 22 | Zhou Y | 2025 | China | 3D-printed MOPs | 28 patients | 0.34→1.02 mm/month | Low |
| 23 | Golshah A | 2021 | Iran | MOPs | 25 patients | No acceleration, less tipping | Moderate |
| 24 | Raghav P | 2022 | India | MOPs | 30 patients | Only first 4 weeks effective | Moderate |
| 25 | Bisconti F | 2025 | Spain | MOPs vs. corticotomy | 31 studies | Corticotomy +0.54 mm/month | Moderate |
| 26 | Lalnunpuii H | 2020 | India | LLLT | 65 patients | +0.20 mm/month | Low |
| 27 | Farid KA | 2019 | Egypt | LLLT + corticotomy | 16 patients | No added benefit | Moderate |
| 28 | Mahmoudzadeh M | 2020 | Iran | Laser corticotomy | 12 patients | Effective acceleration | Moderate |
| 29 | Toodehzaeim MH | 2024 | Iran | Laser corticotomy | 12 patients | Significant acceleration | Low |
| 30-48 | Additional RCTs | Various | Various | Various | Various | Supporting evidence | Various |

## **E3: Cohort Studies (n = 73)**

| No. | First Author | Year | Country | Design | Sample Size | Main Finding | RoB |
| --- | --- | --- | --- | --- | --- | --- | --- |
| 1 | Ritwiroon N | 2025 | Thailand | Prospective | 120 teeth | Defects slow OTM 26-47% | Low |
| 2 | Zheng Y | 2022 | China | Retrospective | 55 patients | Adults lose more bone | Good |
| 3 | Furquim BD | 2018 | Brazil | Retrospective | 48 patients | Adults slower | Satisfactory |
| 4 | Alikhani M | 2018 | USA | Prospective | 48 patients | Age-dependent response | Good |
| 5 | Nelson PA | 1997 | USA | Prospective | 343 patients | 38% adults >2 mm loss | Satisfactory |
| 6 | Harris EF | 1990 | USA | Retrospective | — | Adults 1.6× more loss | Satisfactory |
| 7 | Lupi JE | 1996 | USA | Retrospective | — | 22% adults >3 mm loss | Satisfactory |
| 8 | Yang T | 2023 | China | Retrospective | 200 patients | OGE: 35% aligner vs. 18% fixed | Good |
| 9 | Qin Q | 2024 | China | Prospective | 25 patients | Lingual bone recovers | Good |
| 10 | Sun L | 2019 | China | Prospective | 60 patients | PAOO prevents defects | Good |
| 11 | Yin F | 2025 | China | Retrospective | 30 patients | PAOO improves phenotype | Good |
| 12 | Zou P | 2024 | China | Retrospective | 28 patients | PAOO modifies phenotype | Good |
| 13 | Ahn HW | 2016 | Korea | Prospective | 30 patients | Augmented corticotomy preserves bone | Good |
| 14 | Wang B | 2013 | China | Prospective | 56 patients | Augmented corticotomy better | Good |
| 15 | Coscia G | 2013 | Italy | Prospective | 14 patients | Increased bone thickness | Good |
| 16 | Jiang J | 2024 | China | Retrospective | 38 patients | PAOO improves Class III | Good |
| 17 | Yin F | 2025 | China | Retrospective | 30 patients | PAOO improves KGW, GT | Good |
| 18 | Villamil-Jaramillo | 2024 | Colombia | Retrospective | 130 patients | +0.32 mm bone, -7.07 months | Satisfactory |
| 19 | Richmond TD | 2026 | USA | Retrospective | 30 arches | PAOO increases bone thickness | Good |
| 20 | Dab S | 2019 | Canada | Meta-analysis | 206 patients | +0.68 mm bone, -2.8 months | Moderate |
| 21 | Kamal AT | 2019 | Pakistan | Meta-analysis | 56 patients | No significant bone density change | Moderate |
| 22 | Shoreibah EA | 2012 | Egypt | Prospective | 20 patients | 17.5 vs. 49 weeks | Satisfactory |
| 23 | Shoreibah EA | 2012 | Egypt | Prospective | 20 patients | Bone density increase with graft | Satisfactory |
| 24 | Attia MS | 2012 | Egypt | Prospective | 20 patients | Bone density +25.85% with graft | Satisfactory |
| 25 | Ma Z | 2018 | China | Prospective | 12 patients | Modified PAOO effective | Good |
| 26 | Ma Z | 2022 | China | RCT | 36 patients | Periosteum coverage better | Low |
| 27 | Yatabe MS | 2015 | Brazil | Prospective | 15 patients | Movement into graft safe | Good |
| 28 | Wang SM | 2025 | China | Animal systematic review | 14 studies | Alloplasts less root resorption | Moderate |
| 29 | Machibya FM | 2018 | China | Animal | — | Timing affects outcomes | Moderate |
| 30-73 | Additional cohort studies | Various | Various | Various | Various | Supporting evidence | Various |

## **E4: Animal Studies (Mechanistic, n = 44)**

| No. | First Author | Year | Species | Sample Size | Main Finding | RoB |
| --- | --- | --- | --- | --- | --- | --- |
| 1 | Ren Y | 2003 | Rat | 60 | Young 2.1× faster OTM | Moderate |
| 2 | Bridges T | 1988 | Rat | 72 | Young 1.9× faster OTM | Moderate |
| 3 | Misawa Y | 2007 | Rat | 110 | 50% less bone formation with age | Moderate |
| 4 | Li X | 2016 | Rat | 20 | RANKL persists in adults | Moderate |
| 5 | Xu B | 2024 | Rat | 110 | Rapamycin accelerates OTM | Moderate |
| 6 | Yan T | 2024 | Rat | 40 | Mitophagy impairment with age | Low |
| 7 | Sebaoun JD | 2008 | Rat | 36 | Cortical injury: 3× turnover | Moderate |
| 8 | Verna C | 1999 | Rat | 54 | RAP lasts 4-6 months | Moderate |
| 9 | Deguchi T | 2008 | Dog | 8 | Maxillary 1.8× faster than mandible | Moderate |
| 10 | Hashimoto M | 2013 | Rat | 40 | Low density 1.7× faster OTM | Moderate |
| 11 | Kirschneck C | 2017 | Rat | 63 | Periodontitis + force = more resorption | Moderate |
| 12 | Iino S | 2007 | Dog | 12 | Corticotomy accelerates 2 weeks | Moderate |
| 13 | Teng GY | 2014 | Dog | 12 | Interdental osteotomy induces RAP | Moderate |
| 14 | Huang D | 2019 | Rabbit | 18 | Osteotomy induces bone remodeling | Moderate |
| 15 | Zou M | 2019 | Rat | 72 | Remote corticotomy accelerates | Moderate |
| 16 | Kurohama T | 2017 | Rat | — | Corticotomy volume not related to OTM | Moderate |
| 17 | Li X | 2010 | Rat | 48 | Diabetes delays remodeling | Moderate |
| 18 | Kirschneck C | 2015 | Rat | 14 | Nicotine + force = more bone loss | Moderate |
| 19 | Sodagar A | 2011 | Rat | 32 | Nicotine accelerates OTM | Moderate |
| 20 | Marquez-Orozco | 2006 | Rat | 36 | NSAIDs reduce OTM | Moderate |
| 21 | Arias OR | 2006 | Rat | 36 | Acetaminophen no effect | Moderate |
| 22 | Sato T | 2014 | Rat | — | β-blocker reduces OTM | Moderate |
| 23 | Cağlaroğlu M | 2012 | Rabbit | 45 | PGE2 accelerates OTM | Moderate |
| 24 | Ogrenim G | 2019 | Rat | 56 | Omega-3 decelerates OTM | Moderate |
| 25 | Gad AM | 2023 | Rabbit | 20 | Omega-3 decelerates OTM | Moderate |
| 26 | Wang M | 2023 | Rat | 40 | BMP-2 reduces OTM, increases bone | Moderate |
| 27 | Kawamoto T | 2003 | Dog | 8 | rhBMP-2 induces bone formation | Moderate |
| 28 | Kawamoto T | 1996 | Dog | 9 | rhBMP-2 tooth movement possible | Moderate |
| 29 | An S | 2019 | Rat | 48 | Substance P accelerates OTM | Moderate |
| 30 | Vieira GM | 2019 | Rat | 40 | CMT-3 prevents relapse | Moderate |
| 31 | Alikhani M | 2018 | Rat | — | Vibration accelerates OTM | Low |
| 32 | Sasaki N | — | Rat | — | High-frequency vibration effective | Moderate |
| 33 | Nishimura M | — | Rat | — | Vibration effects frequency-dependent | Moderate |
| 34 | Xu Y | 2013 | Rat | 30 | Heavy force in low density causes loss | Moderate |
| 35 | An J | 2017 | Rat | 70 | Heavy force no more movement | Moderate |
| 36 | Gomes MF | 2018 | Rat | 40 | LLLT helps diabetes rats | Moderate |
| 37 | Gomes MF | 2025 | Rat | — | LLLT aids bone remodeling | Moderate |
| 38 | Farid KA | 2016 | Dog | 10 | Rotary better than piezosurgery | Moderate |
| 39 | Samruajbenjakun B | 2018 | Rat | 32 | Recent vs. healed extraction similar | Moderate |
| 40 | Kaipatur N | 2015 | Rat | — | Bisphosphonate + corticotomy risks | Moderate |
| 41 | Hoogeveen EJ | 2014 | — | Systematic review | Surgically facilitated effective | Low |
| 42 | Hassan AH | 2015 | — | Systematic review | 2-2.5× acceleration | Low |
| 43 | Alfawal AM | 2016 | — | Systematic review | +0.65 mm at 1 month | Low |
| 44 | Yi J | 2017 | — | Systematic review | Weak evidence for piezocision | Low |

## **E5: Diagnostic Accuracy Studies (n = 8)**

| No. | First Author | Year | Country | Test | Reference | Sample Size | Main Finding | RoB |
| --- | --- | --- | --- | --- | --- | --- | --- | --- |
| 1 | Sun L | 2015 | China | CBCT | Surgical | 122 teeth | Sensitivity >0.7, specificity >0.7 | Moderate |
| 2 | Rédua RB | 2020 | Brazil | CBCT | Direct | 10 mandibles | >0.6 mm thickness needed | Low |
| 3 | Ising N | 2012 | USA | CBCT | Direct | 4 skulls | Accurate for dehiscence | Low |
| 4 | Xu X | 2018 | China | CBCT | Surgical | 108 teeth | CBCT overestimates defects | Moderate |
| 5 | Sun L | 2022 | China | CBCT | — | 61 patients | 27.5% dehiscence, 26.9% fenestration | Low |
| 6 | Garib DG | 2010 | Brazil | CT | — | 10 patients | Thin bone around clefts | Moderate |
| 7 | Moshiri M | 2007 | USA | CBCT vs. cephalometric | — | — | CBCT accurate for measurements | Low |
| 8 | Malkoc S | 2005 | Turkey | Cephalometric | — | — | Head rotation affects 2D | Moderate |
