# Supplementary material
Source: Research Square preprint supplement (doi:10.21203/rs.3.rs-9879471/v1)
Supplement: Supplementary file 7 [file ed2410109e778044dd3cc322.docx]

# **SUPPLEMENTARY APPENDIX B: RISK OF BIAS TABLES FOR 20 MOST CRITICAL STUDIES**

## **Risk of Bias Assessment Tool Key**

| Tool | Study Types |
| --- | --- |
| RoB 2 | Randomized controlled trials |
| ROBINS-I | Non-randomized intervention studies |
| Newcastle-Ottawa Scale (NOS) | Cohort studies (0-9 stars) |
| JBI Checklist | Cross-sectional prevalence studies (0-9) |
| SYRCLE | Animal studies (10 domains) |
| QUADAS-2 | Diagnostic accuracy studies |

## **Table B1: Randomized Controlled Trials (RoB 2)**

| Study (Year) | Intervention | Randomization | Deviations | Missing data | Outcome measurement | Selective reporting | Overall |
| --- | --- | --- | --- | --- | --- | --- | --- |
| Alsino et al. (2024) | PAOO vs. conventional | Low | Low | Low | Low | Low | **Low** |
| Alsino et al. (2022) | PAOO (8 RCTs aggregated) | Low | Moderate | Low | Low | Low | **Moderate** |
| Bahammam (2014) | PAOO graft comparison | Low | Low | Low | Moderate | Low | **Moderate** |
| Charavet et al. (2016) | Piezocision vs. control | Low | Low | Low | Low | Low | **Low** |
| Charavet et al. (2021) | CAD/CAM + piezocision | Low | Low | Low | Low | Low | **Low** |
| Gibreal et al. (2019) | Piezocision vs. control | Low | Low | Low | Low | Low | **Low** |
| Khlef et al. (2023) | Flapless vs. traditional corticotomy | Low | Low | Low | Low | Low | **Low** |
| Al-Naoum et al. (2014) | Corticotomy vs. control | Moderate | Moderate | Low | Low | Low | **Moderate** |
| Patterson et al. (2016) | Corticotomy (multiple RCTs) | Moderate | Moderate | Low | Moderate | Low | **Moderate** |
| Alfawal et al. (2016) | Minimally invasive surgery | Low | Low | Low | Low | Low | **Low** |
| Ng et al. (2018) | LLLT vs. placebo | Low | Low | Low | Low | Low | **Low** |
| Dehis et al. (2024) | LLLT for en masse retraction | Low | Low | Low | Low | Low | **Low** |
| Shaadouh et al. (2024) | Low-intensity electrical current | Low | Low | Low | Low | Low | **Low** |
| Katchooi et al. (2018) | Vibration vs. sham | Low | Low | Low | Low | Low | **Low** |

## **Table B2: Cohort Studies (Newcastle-Ottawa Scale - stars out of 9)**

| Study (Year) | Design | Selection (0-4) | Comparability (0-2) | Outcome (0-3) | Total (0-9) | Quality |
| --- | --- | --- | --- | --- | --- | --- |
| Ritwiroon et al. (2025) | Prospective | 4 | 2 | 3 | 9 | **Good** |
| Zheng et al. (2022) | Retrospective | 3 | 2 | 2 | 7 | **Good** |
| Furquim et al. (2018) | Retrospective | 3 | 1 | 2 | 6 | **Satisfactory** |
| Alikhani et al. (2018) | Prospective | 4 | 2 | 3 | 9 | **Good** |
| Jäger et al. (2017) | Retrospective | 3 | 1 | 2 | 6 | **Satisfactory** |
| Nelson & Artun (1997) | Prospective | 3 | 1 | 2 | 6 | **Satisfactory** |
| Harris & Baker (1990) | Retrospective | 3 | 1 | 2 | 6 | **Satisfactory** |
| Yang et al. (2023) | Retrospective | 3 | 2 | 2 | 7 | **Good** |
| Qin et al. (2024) | Prospective | 4 | 2 | 2 | 8 | **Good** |
| Sun et al. (2019) | Prospective | 4 | 2 | 3 | 9 | **Good** |
| Villamil-Jaramillo et al. (2024) | Retrospective | 3 | 1 | 2 | 6 | **Satisfactory** |
| Yin et al. (2025) | Retrospective | 3 | 2 | 2 | 7 | **Good** |

## **Table B3: Cross-Sectional CBCT Prevalence Studies (JBI Checklist - stars out of 9)**

| Study (Year) | Population | Sampling | Sample size | Measurements | Statistical analysis | Total (0-9) | Quality |
| --- | --- | --- | --- | --- | --- | --- | --- |
| Enhos et al. (2012) | Vertical patterns | Consecutive | Adequate | Validated | Appropriate | 7 | **Good** |
| Yagci et al. (2012) | Skeletal classes | Consecutive | Adequate | Validated | Appropriate | 8 | **Good** |
| Evangelista et al. (2010) | Class I/II | Consecutive | Adequate | Validated | Appropriate | 7 | **Good** |
| Choi et al. (2020) | Posterior crossbite | Consecutive | Adequate | Validated | Appropriate | 8 | **Good** |
| Sun et al. (2022) | Class I normal | Consecutive | Adequate | Validated | Appropriate | 8 | **Good** |
| Dominiak et al. (2021) | General | Consecutive | Adequate | Validated | Appropriate | 7 | **Good** |
| Jing et al. (2021) | Class III | Consecutive | Adequate | Validated | Appropriate | 8 | **Good** |
| Sun et al. (2015) | Diagnostic accuracy | Consecutive | Adequate | Validated | Appropriate | 7 | **Good** |

## **Table B4: Animal Studies (SYRCLE - key domains)**

| Study (Year) | Species | Sample size | Allocation concealment | Random housing | Blinding | Incomplete data | Other bias | Overall |
| --- | --- | --- | --- | --- | --- | --- | --- | --- |
| Ren et al. (2003) | Rat | 60 | Unclear | Yes | Unclear | No | No | **Moderate** |
| Bridges et al. (1988) | Rat | 72 | Unclear | Yes | Unclear | No | No | **Moderate** |
| Misawa et al. (2007) | Rat | 110 | Unclear | Yes | Unclear | No | No | **Moderate** |
| Li et al. (2016) | Rat | 20 | Unclear | Yes | Unclear | No | No | **Moderate** |
| Xu et al. (2024) | Rat | 110 | Unclear | Yes | Unclear | No | No | **Moderate** |
| Yan et al. (2024) | Rat | 40 | Yes | Yes | Unclear | No | No | **Low** |
| Wang et al. (2024) | Rat | 40 | Unclear | Yes | Unclear | No | No | **Moderate** |
| Mayahara et al. (2007) | Human cells in vitro | — | N/A | N/A | N/A | N/A | N/A | **N/A** |
