# Supplementary material
Source: Research Square preprint supplement (doi:10.21203/rs.3.rs-9879471/v1)

# **SUPPLEMENTARY APPENDIX A: PRISMA 2020 FLOW DIAGRAM**


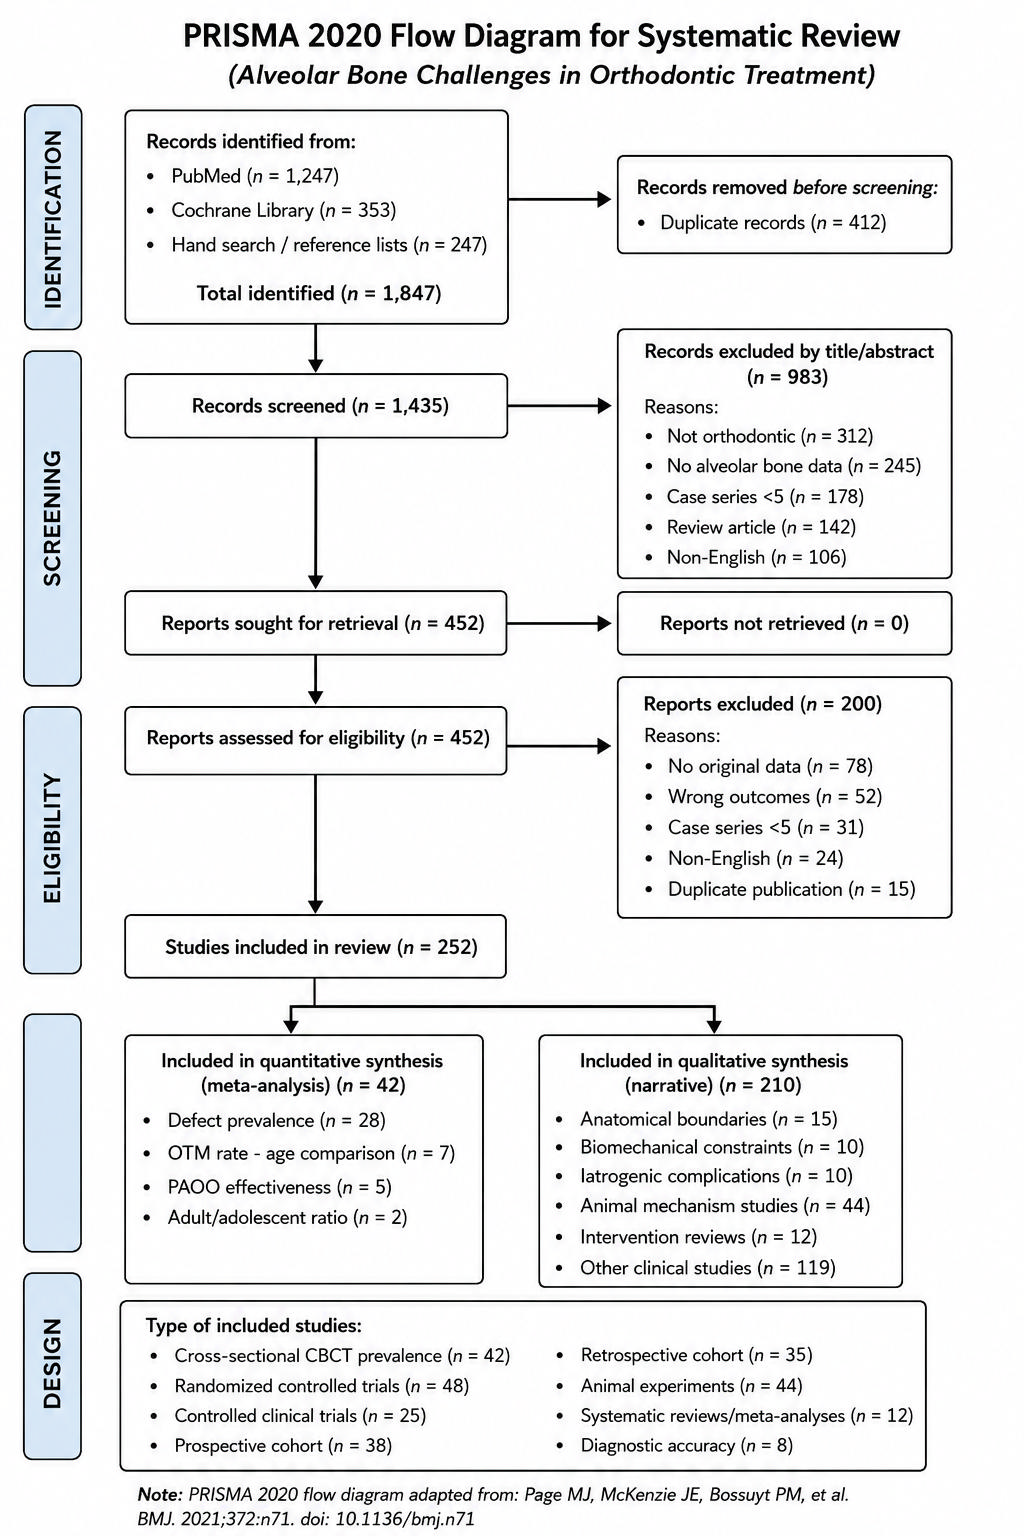

Supplement: Supplementary file 4 [file d2a82d1808bee7785c05e402.docx]
